# Supplementary material for: Metal Embedded Porous Carbon for Efficient CO2 Cycloaddition under Mild Conditions
Source: MDPI journal article supplement (doi:10.3390/catal12040427), 2022-04-11
Supplement: s1 [file s1]

## Supporting Information

# Metal Embedded Porous Carbon for Efficient CO<sub>2</sub> Cycloaddition under Mild Conditions

Chen Qi <sup>1</sup>, Somboon Chaemchuen <sup>1,\*</sup>, Meng Liu <sup>1,2</sup>, Jichao Wang <sup>1,2</sup>, Serge Zhuiykov <sup>3</sup> and Francis Verpoort <sup>1,4,\*</sup>

<sup>1</sup> State Key Laboratory of Advanced Technology for Materials Synthesis and Processing, Wuhan University of Technology, Wuhan 430070, China; chenqi1529368578@icloud.com (C.Q.); lmeng202201@163.com (M.L.); wangjichao\_whut@163.com (J.W.)

<sup>2</sup> School of Materials Science and Engineering, Wuhan University of Technology, Wuhan 430070, China

<sup>3</sup> Centre for Environmental & Energy Research, Faculty of Bioscience Engineering, Ghent University Global Campus Global Campus Songdo, Ghent University, 119 Songdomunhwa-Ro, Incheon 21985, Korea; serge.zhuiykov@ghent.ac.kr

<sup>4</sup> Research School of Chemistry & Applied Biomedical Sciences, National Research Tomsk Polytechnic University, Lenin Avenue 30, 634050 Tomsk, Russia

\* Correspondence: sama\_che@hotmail.com (S.C.); francis@whut.edu.cn (F.V.)

## Content:

|                          |    |
|--------------------------|----|
| 1. Material synthesis    | 1  |
| 2. Characterization      | 3  |
| 3. Catalytic experiments | 11 |

## 1. Material synthesis

### 1.1. Zeolitic imidazole frameworks (ZIFs) synthesis

All chemical reagents for synthesis of materials and substrates were purchased from Aladdin Chemical and used as received. The solvents were directly used after purchase from Sinopharm Chemical. The ZIFs (template materials) were synthesized at room temperature. A typical synthesis, the metal sources (Zn(NO<sub>3</sub>)<sub>2</sub>•6H<sub>2</sub>O and/or Co(NO<sub>3</sub>)<sub>2</sub>•6H<sub>2</sub>O) and ligand source (2-methylimidazole, Hmim) were separately dissolved in 100 mL deionized water). The mole ratio Metal:Ligand:Water is 1:8:1100 and was constant for all synthesized ZIFs. The triethylamine (5mL) as deprotonating agent was added in an aqueous Hmim before mixing with an aqueous metal solution under vigorous stirring. The details of metal, ligand source, and solvent (water) are provided in Table S1. The homogeneous solutions of metal and ligand were mixed under vigorous

stirring at room temperature for 24 h. The solid precipitate was separated using a centrifuge (9500 rpm, 5 min) and washed with deionized water for four times or until the obtained solution after centrifugal was clear. The solid products were dried at 90°C under vacuum for overnight before further used in next step.

**Table S1.** The mole and mass/volume of reagent were obtained to synthesis ZIF-8, ZIF-67 and dual metal Zn/Co-ZIF.

| Sample   | Metal source                                         |                                                      | Ligand        | TEA  | water  |
|----------|------------------------------------------------------|------------------------------------------------------|---------------|------|--------|
|          | Zn(NO <sub>3</sub> ) <sub>2</sub> ·6H <sub>2</sub> O | Co(NO <sub>3</sub> ) <sub>2</sub> ·6H <sub>2</sub> O | 2-MIM         |      |        |
| ZIF-8    | 10 mmol, 2.97g                                       | -                                                    | 80 mmol, 6.5g | 5 mL | 200 ml |
| ZIF-67   | -                                                    | 10 mmol, 2.91g                                       | 80 mmol, 6.5g | 5 mL | 200 ml |
| ZnCo-ZIF | 10 mmol, 1.48 g                                      | 0.5 mmol, 1.45g                                      | 80 mmol, 6.5g | 5 mL | 200 ml |

## 1.2. Porous carbonaceous material synthesis

An alumina ceramic boat (30x60x15 mm) containing the template material (250-300 mg of ZIFs) is transferred into a quartz tube (OD 60 mm, 1000 mm), which is installed in the muffle furnace (TL 1200, Nanjing Bo Yun Tong Instrument Technology Co. Ltd.). The system is purged with a 5%H<sub>2</sub>/Ar flow having a rate of 50 cm<sup>3</sup>·min<sup>-1</sup> (mass flow controller, S48-32HMT, Nanjing Bo Yun Tong Instrument Technology Co. Ltd.) for 20 min before ramping the temperature. The pyrolysis process was controlled using a temperature program with a heating rate of 10°C·min<sup>-1</sup>. The final temperature was kept for 1h up to 4h before cooling to room temperature. During the pyrolysis, a continuous flow (50 cm<sup>3</sup>·min<sup>-1</sup>) of 5%H<sub>2</sub>/Ar was applied. The pyrolyzed materials were stored for further use in a desiccator to avoid moisture adsorption. The pyrolyzed materials revealed a weight loss of about 50-60% based on the weight of the template material.

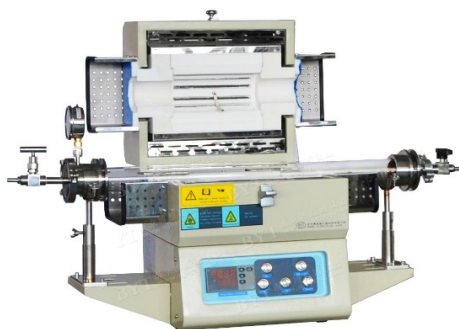

**Figure S1.** The muffle furnace: TL 1200, Nanjing Bo Yun Tong Instrument Technology Co. Ltd.

## 2. Characterization

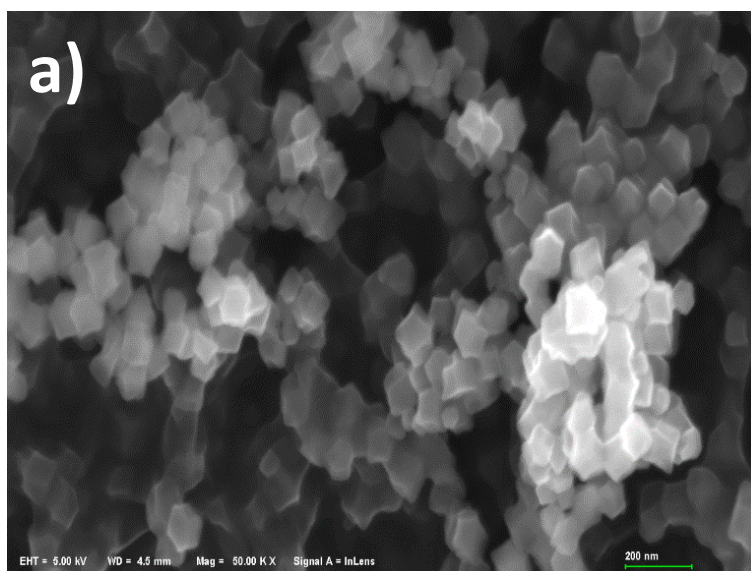

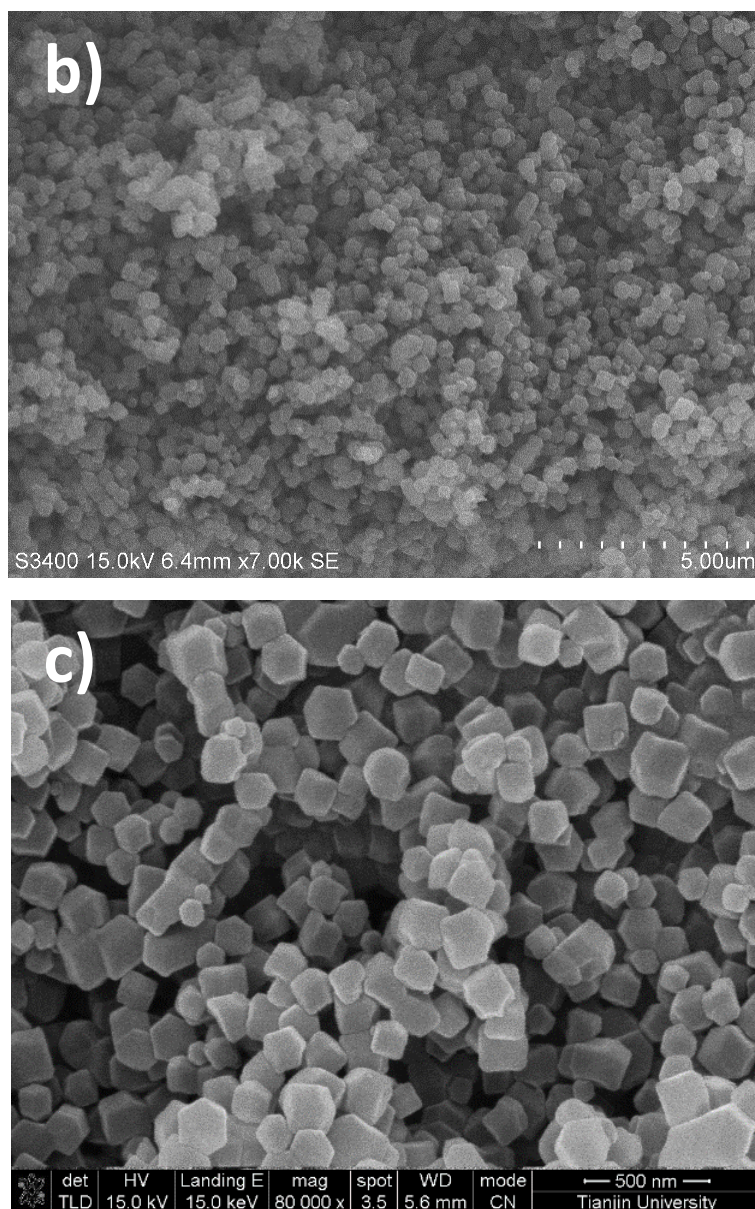

**Figure S2.** Crystal morphologies of as synthesized ZIF-8 (a), ZIF-67 (b), and bimetal ZnCo-ZIF(c) using SEM.

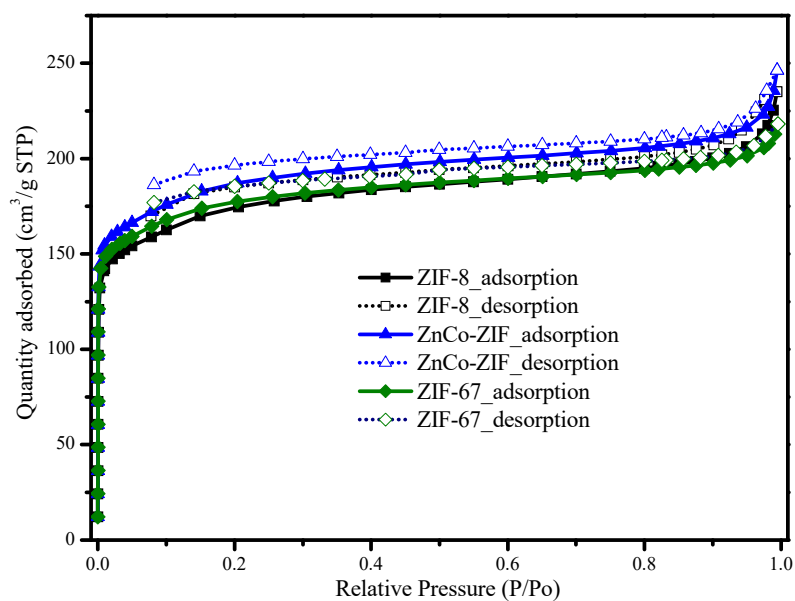

**Figure S3.** N<sub>2</sub> adsorption isotherms at 77K of template ZIF-8, ZIF-67, and bimetal ZnCo-ZIF

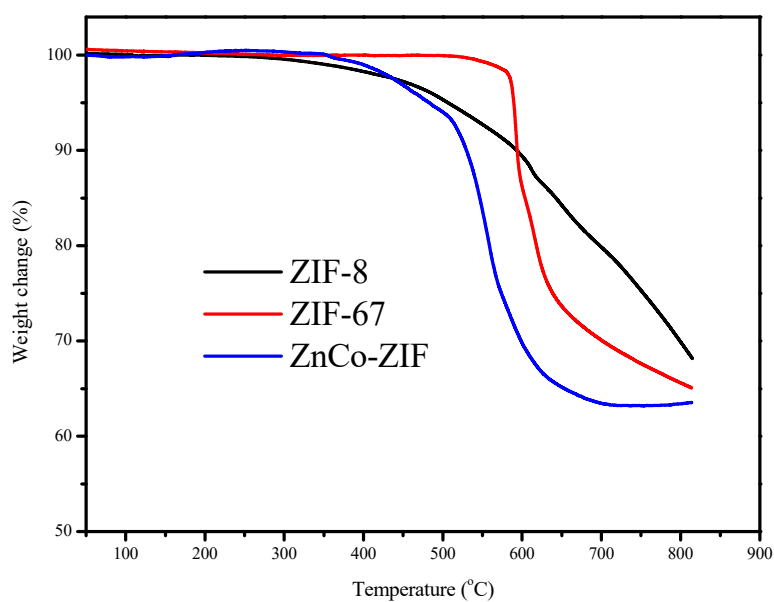

**Figure S4.** TGA analyses of ZIF series from room temperature up to 800°C with a heating rate of 10°C/min under Ar atmosphere (20 cc/min). All the ZIF-8 samples were activated at 200°C under vacuum for 3h before TGA analysis.

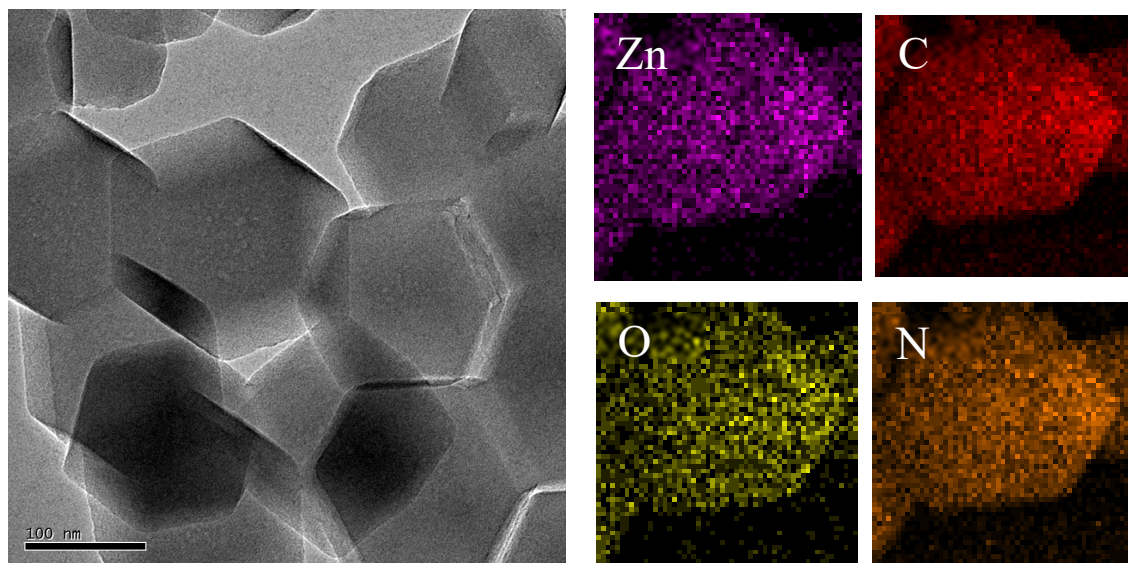

**Figure S5.** Transmission electron microscope (TEM) image and elemental mapping (EDX) of ZIF-8. High-resolution transmission electron microscope (HR-TEM) and energy dispersive X-ray spectroscopy (EDS) analyses were carried out using a JEOL JEM-2100F microscope operating at a high voltage of 200 kV.

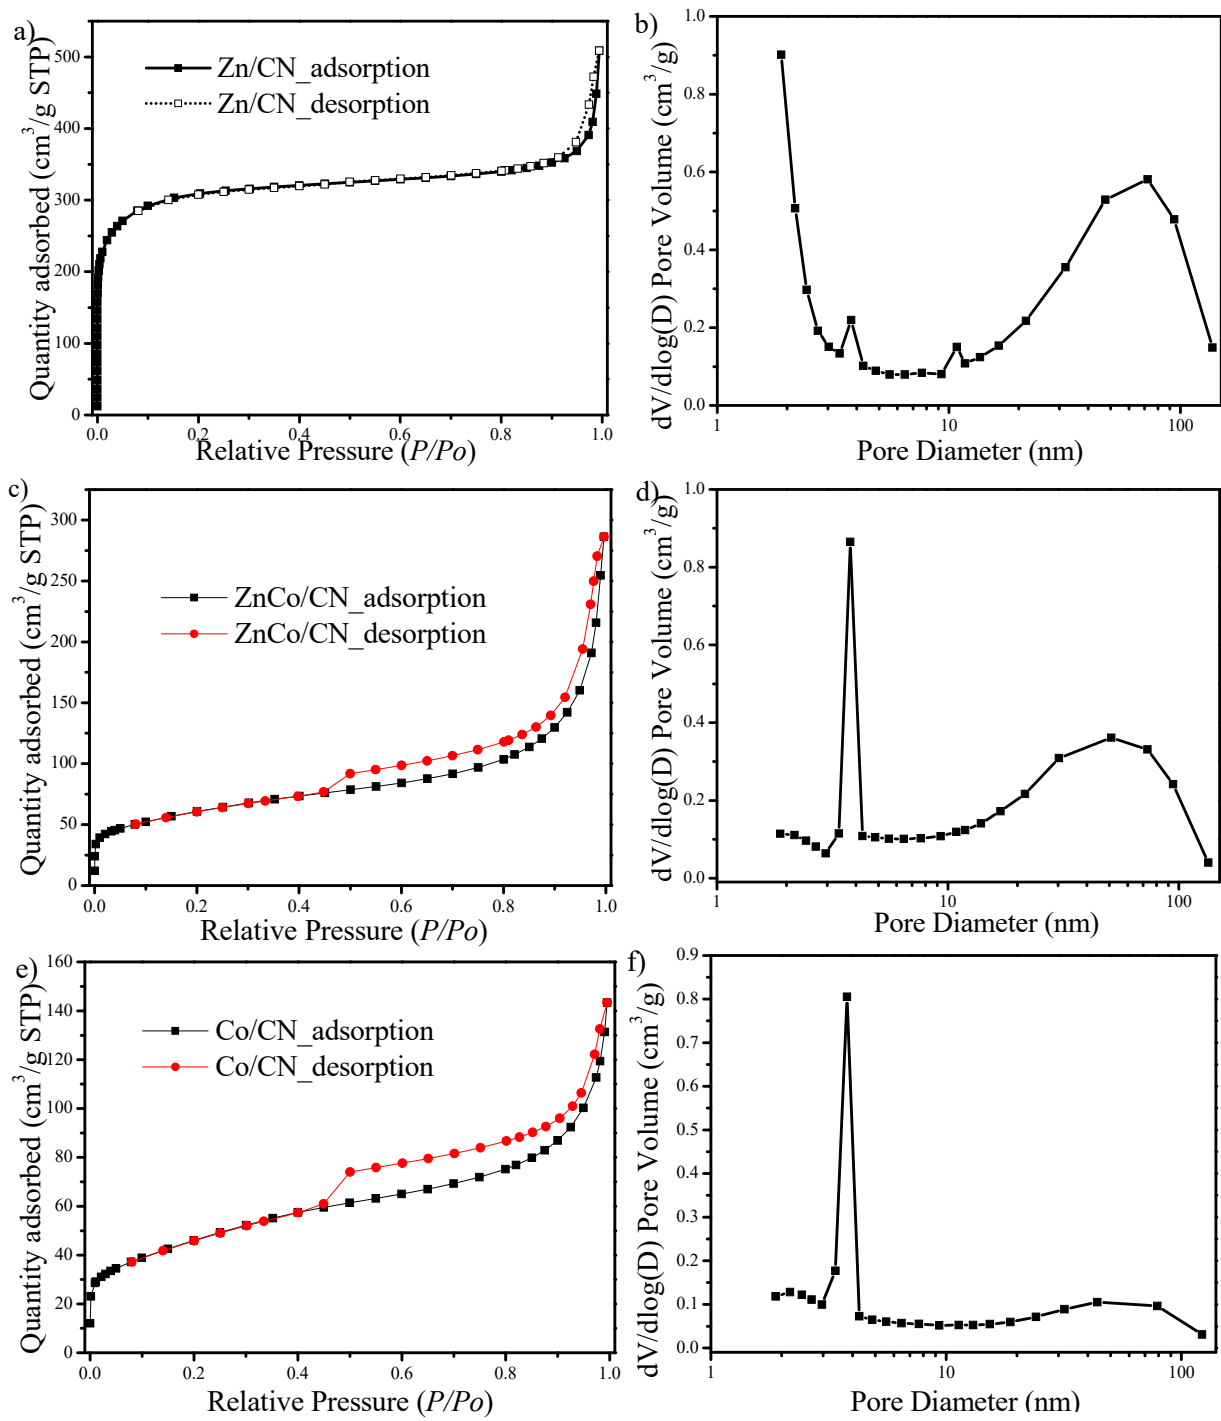

**Figure S6.** N<sub>2</sub> adsorption isotherm at 77K and pore size distribution (BJH) of Zn/CN-1000 (a, b). ZnCo/CN-1000 (c, d), and bimetal Zn/CN-1000 (e, f).

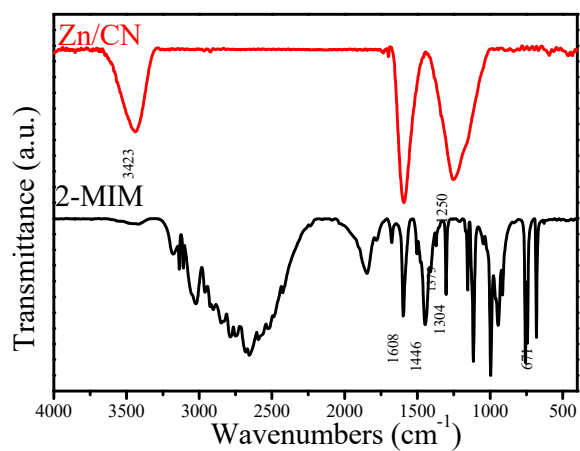

**Figure S7.** FTIR spectra of pyrolyzed ZIF compared with organic linker.

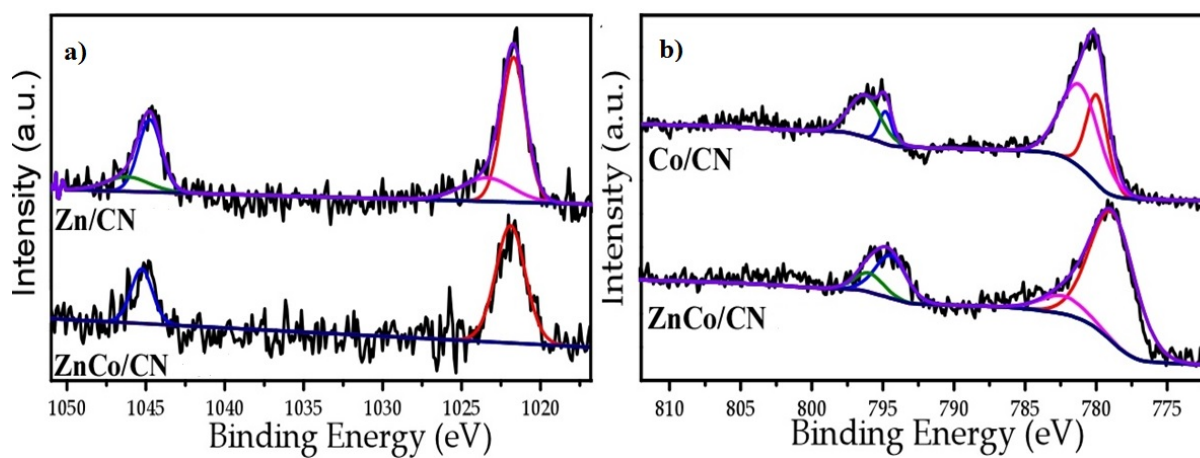

**Figure S8.** High-resolution XPS spectra of zinc (a) and cobalt region (b) from Zn/CN, Co/CN and ZnCo/CN



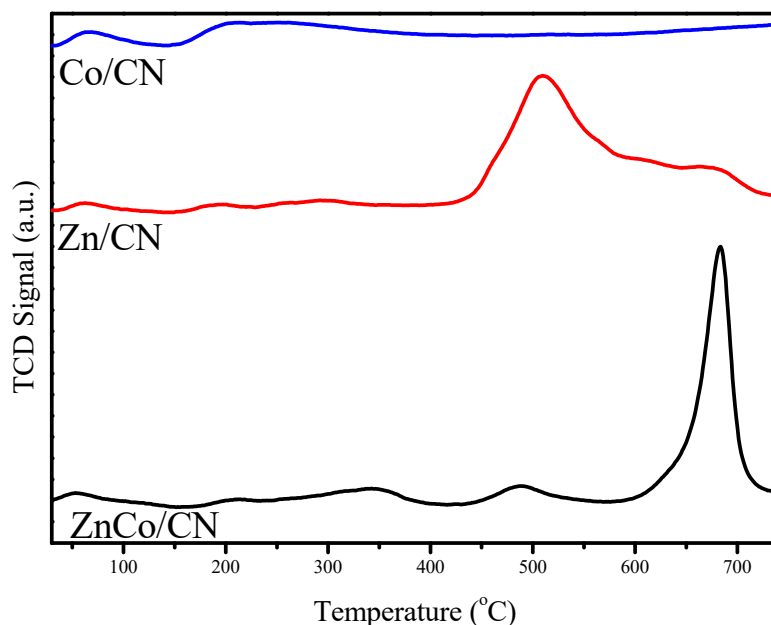

**Figure S9.** CO<sub>2</sub>-TPD analysis of synthesized porous carbon: ZnCo/CN (bottom), Zn/CN(middle), and Co/CN(top).

Temperature programmed desorption (TPD) was performed for all samples using a Micromeritics Chemisorb (AutoChem II 2920) with ChemiSoft TPx software. The samples were pretreated at 150°C under carrier He gas for 3h, and then cooled to the adsorption temperature at 25 °C. NH<sub>3</sub> as probe gas was introduced to the sample by continuous flow. The probe gas was adsorbed to saturation at adsorption temperature of 25°C which can be observed from the stable TCD detector signal. The physically adsorbed gas on the samples was then removed by flushing the samples with He-gas till a stable TCD signal was obtained. The temperature programmed desorption was measured using a TCD detector, temperature rising to 750 °C at a rate of 10 °C/min.

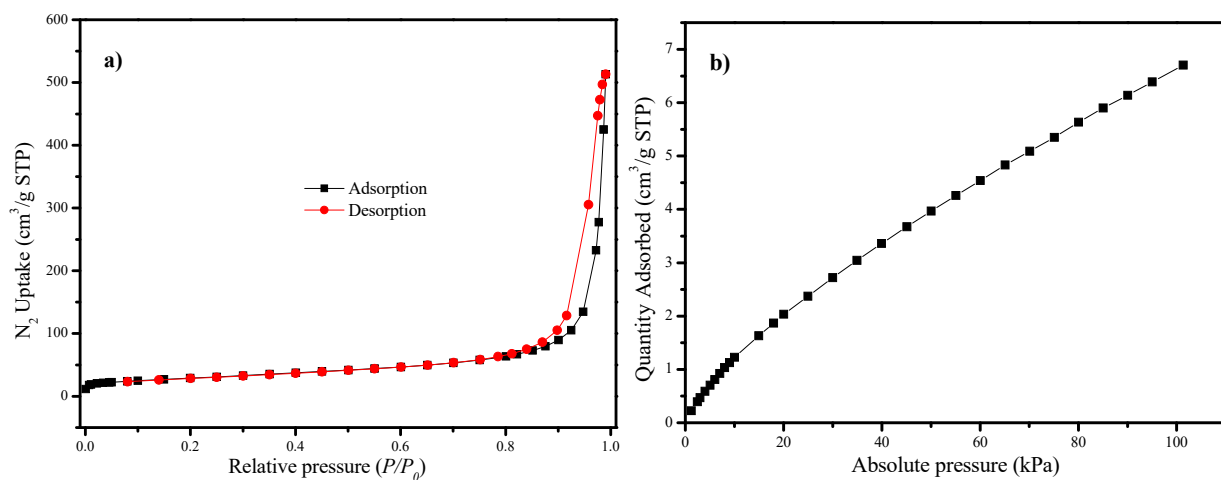

**Figure S10.** Nitrogen adsorption isotherm at 77K (a) and  $CO_2$  adsorption at 273K (b) on Carbon graphite

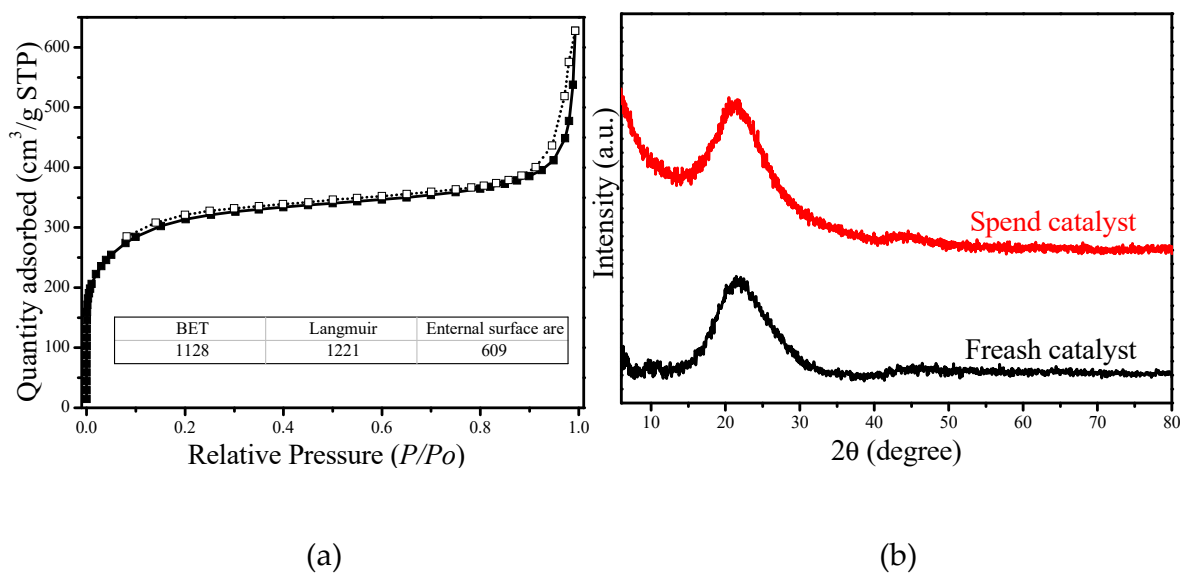

**Figure S11.** (a)  $N_2$  adsorption isotherm at 77K of Zn/CN after reaction (spend catalyst). (b) XRD diffraction of fresh and spend Zn/CN

**Table S2.** The elemental composition of materials

| Samples            | Zn % wt <sup>1</sup> | Co %wt <sup>1</sup> | N %wt <sup>2</sup> | C %wt <sup>2</sup> |
|--------------------|----------------------|---------------------|--------------------|--------------------|
| ZnCo-ZIF           | 16.0                 | 16.4                | 24.5               | 41.9               |
| ZnCo/CN            | 0.05                 | 5.85                | 1.9                | 53.7               |
| ZIF-67             | 0.0                  | 27.7                | 25.1               | 43.1               |
| Co/CN              | 0.0                  | 29                  | 6.9                | 27.6               |
| ZIF-8              | 27.8                 | 0.0                 | 24.2               | 43.1               |
| Zn/CN <sup>3</sup> | 1.80                 | 0.0                 | 3.5                | 61.9               |

<sup>1</sup> ICP in wt% from Inductively coupled plasma atomic emission spectroscopy (ICP-OES, Varian VISTAMPX),

<sup>2</sup> CHN Elemental analysis (Vario EL cube),

<sup>3</sup> holding pyrolysis at 1000°C for 1h,

### 3. Catalytic experiments

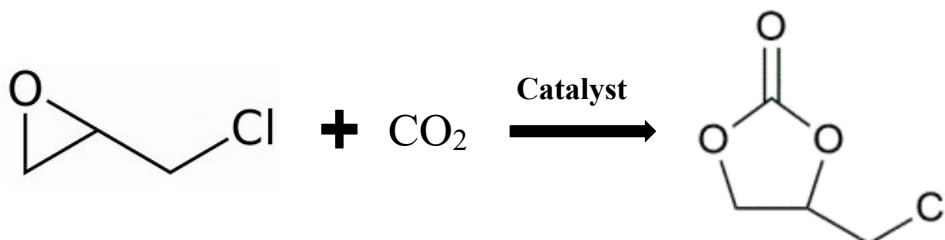

CO<sub>2</sub> addition into epichlorohydrin producing 3-chloro-1-propene carbonate.

The progression of reaction was identified from <sup>1</sup>H NMR in CDCl<sub>3</sub> 500 MHz:

**Epichlorohydrin:** δ 3.57-3.63 (m, 2H), **3.23 (m, 1H)**, 2.68 (m, 1H), 2.88 (m, 1H);

**3-chloro-1-propene carbonate:** <sup>1</sup>H NMR (500 MHz, CDCl<sub>3</sub>): δ **4.90-5.02 (m, 1H)**, 4.61 (dd, *J* = 8.6 Hz, 1H), 4.45 (dd, *J* = 8.9, 5.7 Hz, 1H), 3.68-3.78 (m, 2H). <sup>13</sup>C NMR (100 MHz, CDCl<sub>3</sub>): δ 154.5, 74.5, 67.0, 44.1.

The catalytic performance was calculated from reaction conversion which is measured from the peak ratio 3.23 (m, 1H) of epichlorohydrin and 4.90-5.02 (m, 1H) of 3-chloro-1-propene carbonate.

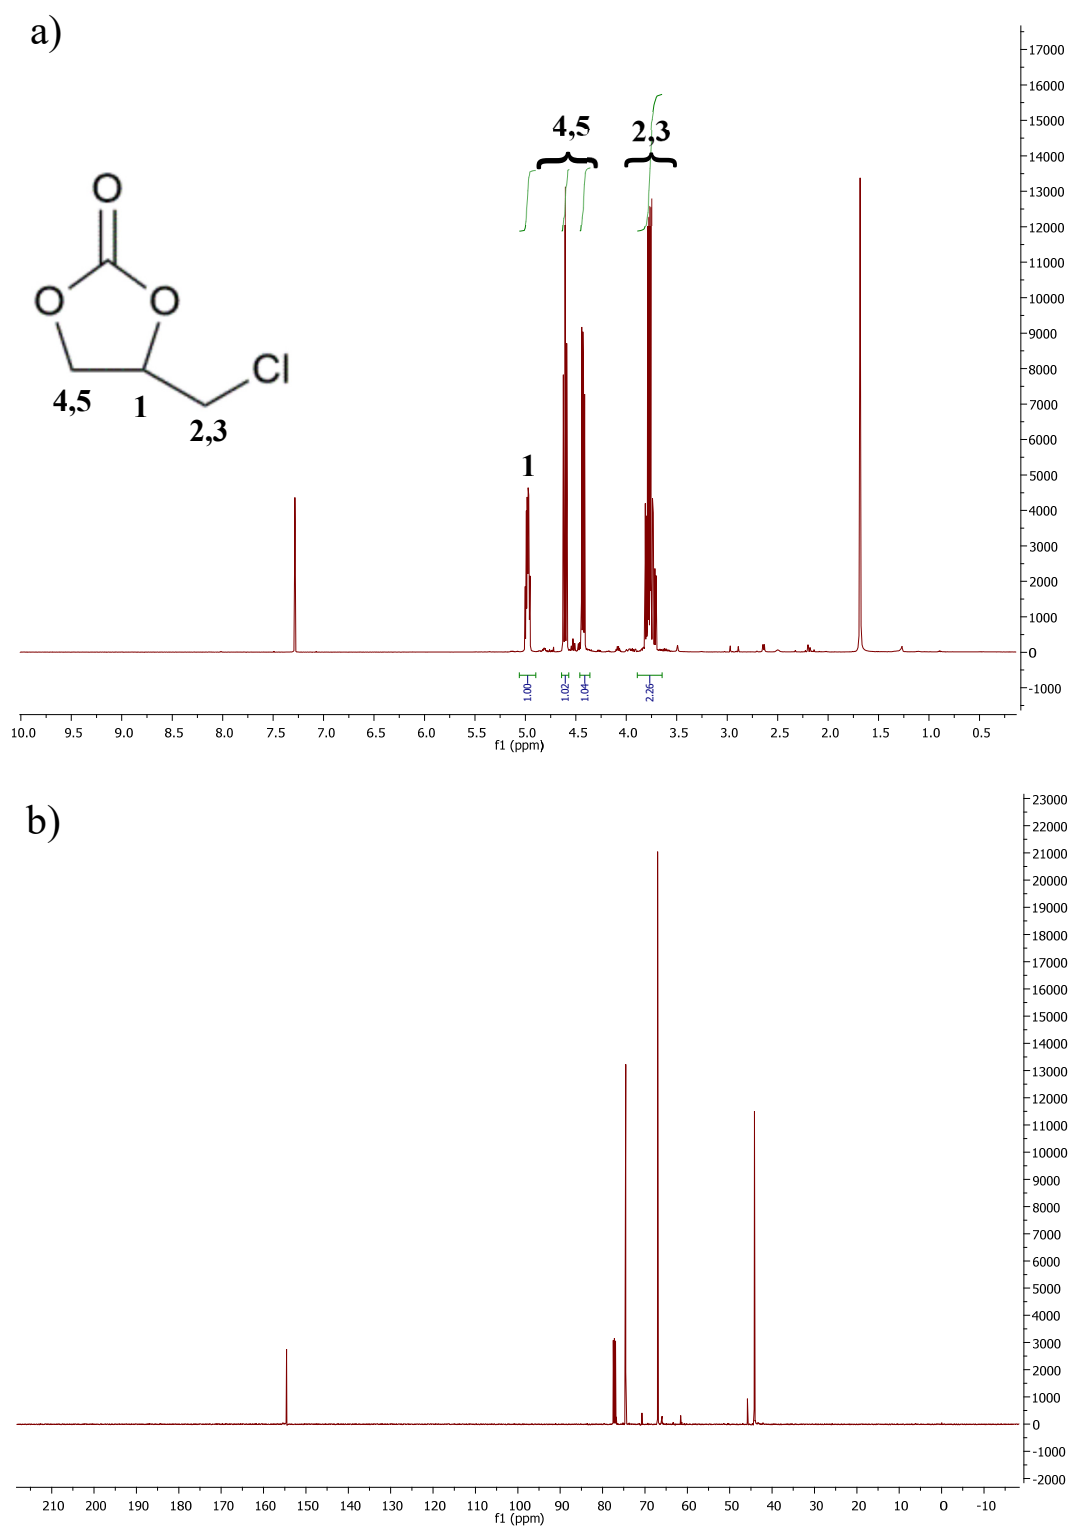

**Figure S12.**  $^1\text{H}$ -NMR (a) and  $^{13}\text{C}$ -NMR (b) spectrum in  $\text{CDCl}_3$  of the product [3-chloro-1-propene carbonate] obtained from the conversion of epichlorohydrin with  $\text{CO}_2$ . Reaction condition: 850 mg epichlorohydrin, 50 mg of Zn/Cn-1000,  $140^\circ\text{C}$ , 8 bar of  $\text{CO}_2$ , 8h.

**Table S3.** Overview of catalytic performance under different reaction conditions

| Entry | Catalyst                                                                     | Substrate (mg)          | Temperature | Time | Reactivity (% Conv.) |
|-------|------------------------------------------------------------------------------|-------------------------|-------------|------|----------------------|
| 1     | non                                                                          | Epichlorohydrin (850mg) | 80          | 24   | 0                    |
| 2     | non                                                                          | Epichlorohydrin (850mg) | 140         | 8    | 1                    |
| 3     | ZnCo-ZIF <sup>a</sup>                                                        | Epichlorohydrin (850mg) | 80          | 24   | 58                   |
| 4     |                                                                              | Epichlorohydrin (850mg) | 140         | 24   | 100                  |
| 5     | ZIF-8 <sup>a</sup>                                                           | Epichlorohydrin (850mg) | 100         | 24   | 40                   |
| 6     |                                                                              | Epichlorohydrin (850mg) | 140         | 24   | 100                  |
| 7     | ZIF-67 <sup>a</sup>                                                          | Epichlorohydrin (850mg) | 90          | 24   | 50                   |
| 8     |                                                                              | Epichlorohydrin (850mg) | 140         | 24   | 100                  |
| 9     | Carbon graphite oxide <sup>d</sup>                                           | Epichlorohydrin (850mg) | 80          | 24   | 5                    |
| 10    | g-C <sub>3</sub> N <sub>4</sub> <sup>d</sup>                                 | Epichlorohydrin (850mg) | 80          | 24   | 21                   |
| 11    | Carbonized-Co(NO <sub>2</sub> ) <sub>3</sub> ·6H <sub>2</sub> O <sup>b</sup> | Epichlorohydrin (850mg) | 80          | 24   | 0                    |
| 12    | Carbonized-Zn(NO <sub>2</sub> ) <sub>3</sub> ·6H <sub>2</sub> O <sup>c</sup> | Epichlorohydrin (850mg) | 80          | 24   | 0                    |
| 13    | Zinc oxide <sup>d</sup>                                                      | Epichlorohydrin (850mg) | 80          | 24   | 6                    |
| 14    | Zinc carbonate <sup>d</sup>                                                  | Epichlorohydrin (850mg) | 80          | 24   | 2                    |
| 15    | 2-Methylimidazole (2-MIM) <sup>d</sup>                                       | Epichlorohydrin (850mg) | 80          | 24   | 90                   |
| 16    | Zn/CN                                                                        | Epichlorohydrin (850mg) | 80          | 24   | 85                   |
| 17    | Zn/CN                                                                        | Epibromohydrin (1260mg) | 80          | 24   | 80                   |
| 18    | Zn/CN                                                                        | Propylene oxide (534mg) | 80          | 24   | 80                   |
| 19    | Zn/CN                                                                        | 1,2-Epoxyhexane (921mg) | 80          | 24   | 83                   |
| 20    | Zn/CN <sup>f</sup>                                                           | Glycidol (682mg)        | 140         | 8    | 78                   |

|    |                    |                                |     |   |    |
|----|--------------------|--------------------------------|-----|---|----|
| 21 | Zn/CN <sup>f</sup> | Butyl Glycidyl Ether (1198mg)  | 140 | 8 | 70 |
| 22 | Zn/CN <sup>f</sup> | Allyl Glycidyl Ether (1050mg)  | 140 | 8 | 54 |
| 23 | Zn/CN <sup>f</sup> | Styrene Oxide (1105mg)         | 140 | 8 | 52 |
| 24 | Zn/CN <sup>f</sup> | Benzyl Glycidyl Ether (1510mg) | 140 | 8 | 35 |
| 25 | Zn/CN <sup>f</sup> | Cyclopentene oxide (774mg)     | 140 | 8 | 23 |

Note: The reaction condition using substrate 9.2 mmol, Catalyst 50 mg, 1 bar of CO<sub>2</sub> pressure.

<sup>a)</sup> Synthesized material via room temperature reported by Kui Zhou, etc.[1]

<sup>b)</sup> The metal precursor to synthesized ZIFs and carbonization under 5%H<sub>2</sub>/Ar at 1000°C for 4h.

<sup>c)</sup> The metal precursor to synthesized ZIFs and carbonization under 5%H<sub>2</sub>/Ar at 800°C for 4h.

<sup>d)</sup> Using catalyst weight of 50 mg

<sup>e)</sup> Reaction condition: 1.7 g of Epichlorohydrin, 50mg of catalyst (Zn/CN-1000-4h)

<sup>f)</sup> Reaction under 8 bar of CO<sub>2</sub> pressure

**Table S4.** Summary catalyst performance and reaction system based on the carbon-based materials for the synthesis of cyclic carbonates with reaction condition

| Catalyst       | Epoxide | Co-catalyst or solvent | Reaction condition |        |       | Conv. | Yield | Ref. |
|----------------|---------|------------------------|--------------------|--------|-------|-------|-------|------|
|                |         |                        | T(°C)              | P(bar) | T (h) |       |       |      |
| ZnO@NPC-Ox-700 | SO      | TBAB, Acetonitrile     | 60                 | 1      | 48    | 98    | 98    | [2]  |
|                | ECH     | TBAB, Acetonitrile     | 60                 | 1      | 24    | 94    | 94    |      |
| N-GMC          | SO      | TBAB, 2-propanol       | 80                 | 10     | 15    | -     | 98    | [3]  |
| C600-ZIF-9     | ECH     | -                      | 80                 | 6      | 6     | 93    | 90    | [4]  |
| AA-950         | ECH     | -                      | 150                | 40     | 16    |       | 84.3  | [5]  |
| CNFWs-600-2    | ECH     | biphenyl               | 150                | 20     | 12    | 98    | 86    | [6]  |
| TW-900         | SO      | TBAB                   | 100                | 8      | 1     | 99    | 95    |      |
| Zn-NCF-1000    | ECH     | -                      | 140                | 8      | 8     | 99    | 99    | [7]  |
| Cu/NC-0.5      | SO      | TBAB                   | 40                 | 1      | 48    | 80    | 100   | [8]  |
| ZnNx@C-700     | SO      | TBAB                   | 100                | 5      | 2     | -     | 93    | [9]  |
|                | PO      |                        | 100                | 5      | 2     | -     | 92    |      |
|                | ECH     |                        | 100                | 5      | 2     | -     | 97    |      |

|                                                   |           |      |       |    |    |      |                 |           |
|---------------------------------------------------|-----------|------|-------|----|----|------|-----------------|-----------|
| ZIF-8/CN-foam                                     | ECH       | -    | 80    | 10 | 24 |      | 93              | [10]      |
| Zn/Co-ZIF-H <sub>2</sub> Ar-1000                  | ECH       | -    | 140   | 8  | 8  |      | 93              | [11]      |
|                                                   | PO        | -    | 140   | 8  | 8  |      | 95              |           |
| Zn-N-HOPCPs (light irradiation)                   | PO        | TBAB | -     | 1  | 10 |      | 95              | [12]      |
| Zn-Asp-300                                        | PO        | TBAB | 80    | 10 | 2  | -    | 97              | [13]      |
|                                                   | ECH       |      | 80    | 10 | 2  | 99.9 | 96.6            |           |
|                                                   | EBr       |      | 80    | 10 | 2  | -    | 96.7            |           |
| HPC-800                                           | EBr       | TBAB | -     | 1  | 10 | -    | 94              | [14]      |
| Co@N0.07C                                         | SO        | TBAB | 60    | 1  | 4  | 99   | 92              | [15]      |
|                                                   | ECH       |      | 60    | 1  | 12 | >84  | 84              |           |
|                                                   | Glycido l |      | 150   | 15 | 15 | 99   |                 |           |
| JA500                                             | ECH       | -    | 150   | 15 | 15 | 99   | 93              | [16]      |
|                                                   | Glycido l |      | 150   | 15 | 15 | 99   | 94              |           |
| M-500                                             | ECH       | -    | 150   | 15 | 15 | 99   |                 | [16]      |
|                                                   | PO        |      | 150   | 15 | 24 | 84   | 99              |           |
| ZnCl <sub>2</sub> /Al <sub>2</sub> O <sub>3</sub> | ECH       | TBAI | 60    | 6  | 6  | -    | 87              | [17]      |
|                                                   | SO        |      | 60    | 4  | 6  | -    | 100             |           |
| ZNC-800                                           | PO        | TBAB | 15-85 | 1  | 10 | -    | 80 <sup>b</sup> | [18]      |
| Zn <sub>4</sub> @POSS-1 <sup>a</sup>              | SO        | TBAI | 100   | 1  | 4  | 96   | -               | [19]      |
| Zn(salen) <sup>a</sup>                            | SO        | TBAB | 50    | 50 | 24 | 98   | >99             | [20]      |
| Zn/CN-1000                                        | ECH       | -    | 90    | 1  | 24 | 98   | 91              | This work |
|                                                   | PO        |      | 80    | 1  | 24 | 80   | 80              |           |

Abbreviation: SO = Styrene oxide, ECH = epichlorohydrin, PO = propylene oxide, EBr = Epibromohydrin, TBAB = tetrabutylammonium bromide,

<sup>a</sup> Metal complex used as a homogeneous catalyst

<sup>b</sup> Photothermally-driven CO<sub>2</sub> cycloaddition



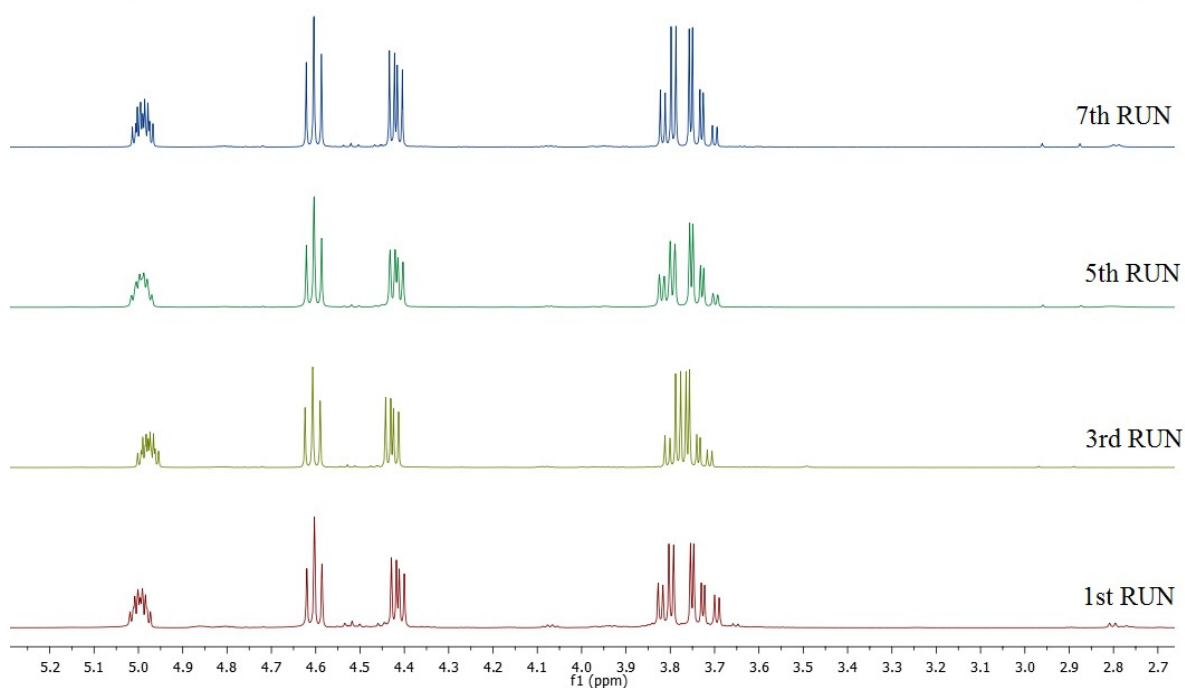

**Figure S13.** The NMR of the recycling experiment using Zn/CN-1000 (reaction conditions: epichlorohydrin 850 mg (9.2 mmol), Catalyst 50 mg, 90°C, 1.5 bar of CO<sub>2</sub> pressure for 24h).

Recycle experiment, the catalyst was separated from solution via centrifugal (9500 rpm, 15 min) and washed with methanol 4 times before drying at 100°C under vacuum overnight. The weight of catalyst was measurement before each cycle to keep the ratio constant between catalyst and substrate.

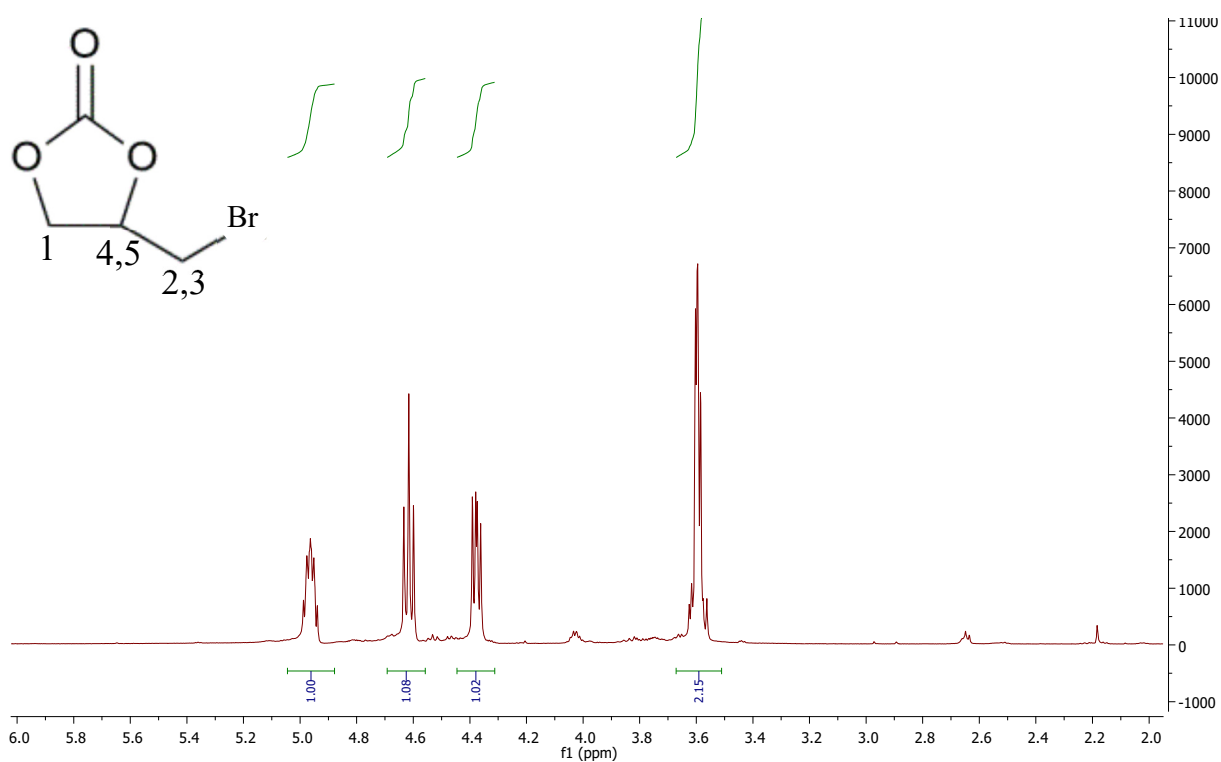

**Figure S14.**  $^1\text{H}$  NMR spectrum in  $\text{CDCl}_3$  of the product [4-(bromomethyl)-1,3-dioxolan-2-one] obtained from the conversion of epibromohydrin using  $\text{Zn/CN-1000}$  (50 mg),  $\text{CO}_2$  pressure 1.5 bar,  $80^\circ\text{C}$  for 24h.

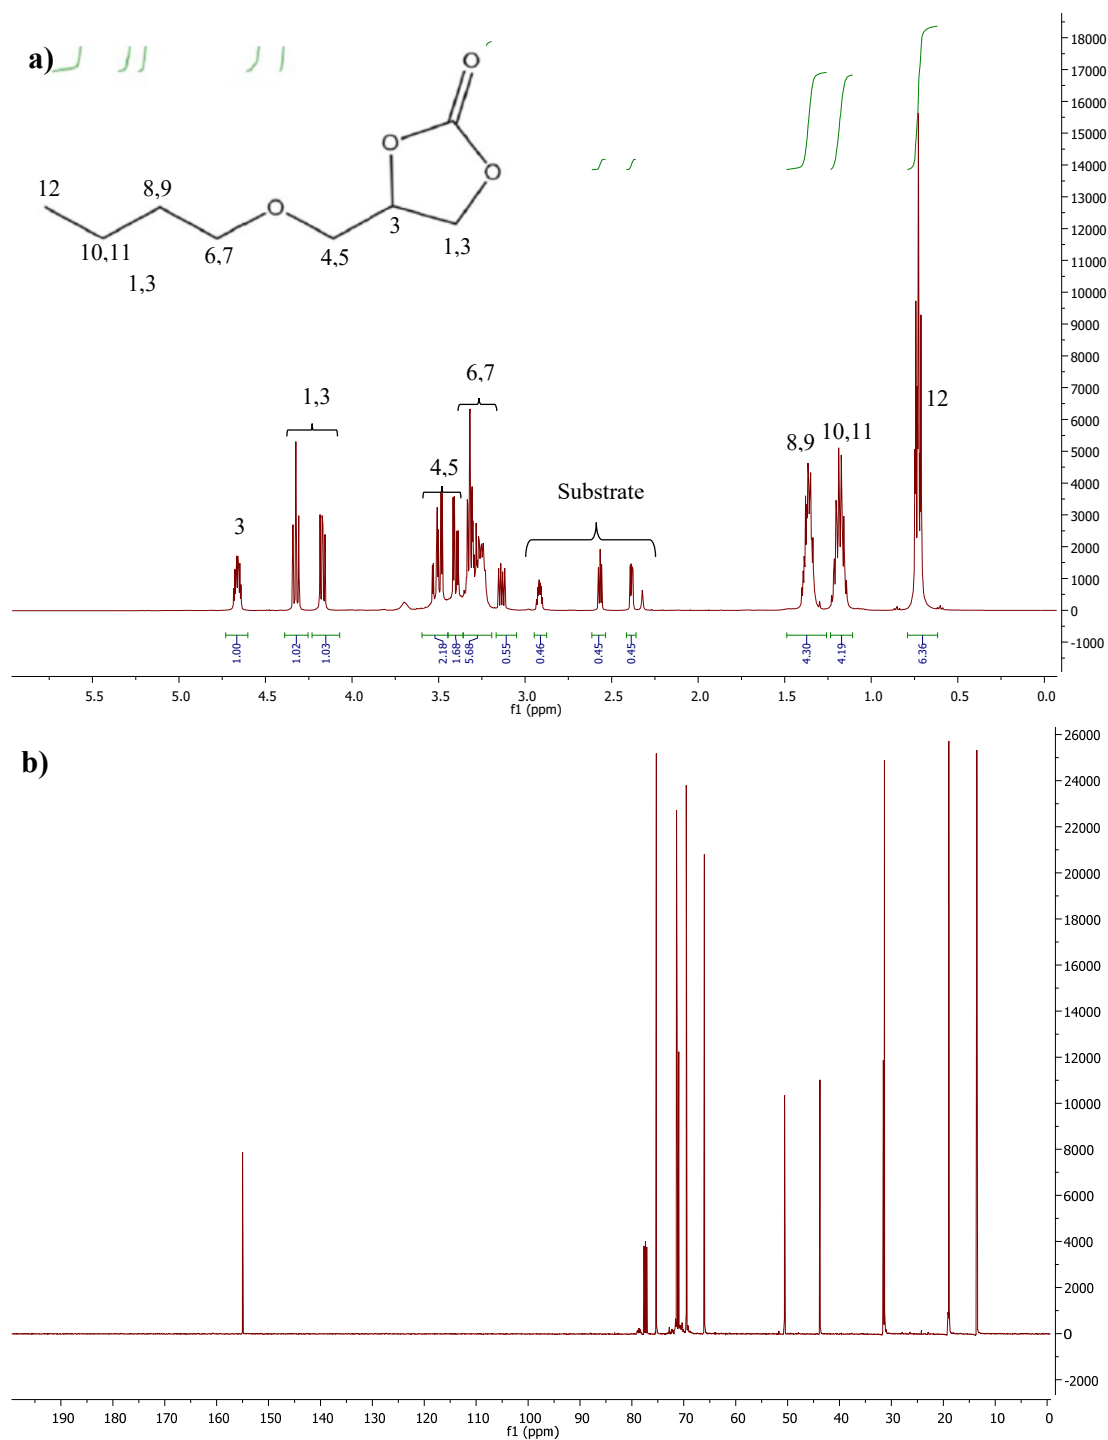

**Figure S15.**  $^1\text{H}$ -NMR (a) and  $^{13}\text{C}$ -NMR (b) spectrum in  $\text{CDCl}_3$  of the product [4-butoxymethyl]-1,3-dioxolan-2-one] obtained from the reaction mixture of butyl glycidyl ether using  $\text{Zn/CN-1000}$  (50 mg),  $\text{CO}_2$  pressure 8 bar,  $140^\circ\text{C}$  for 24h.

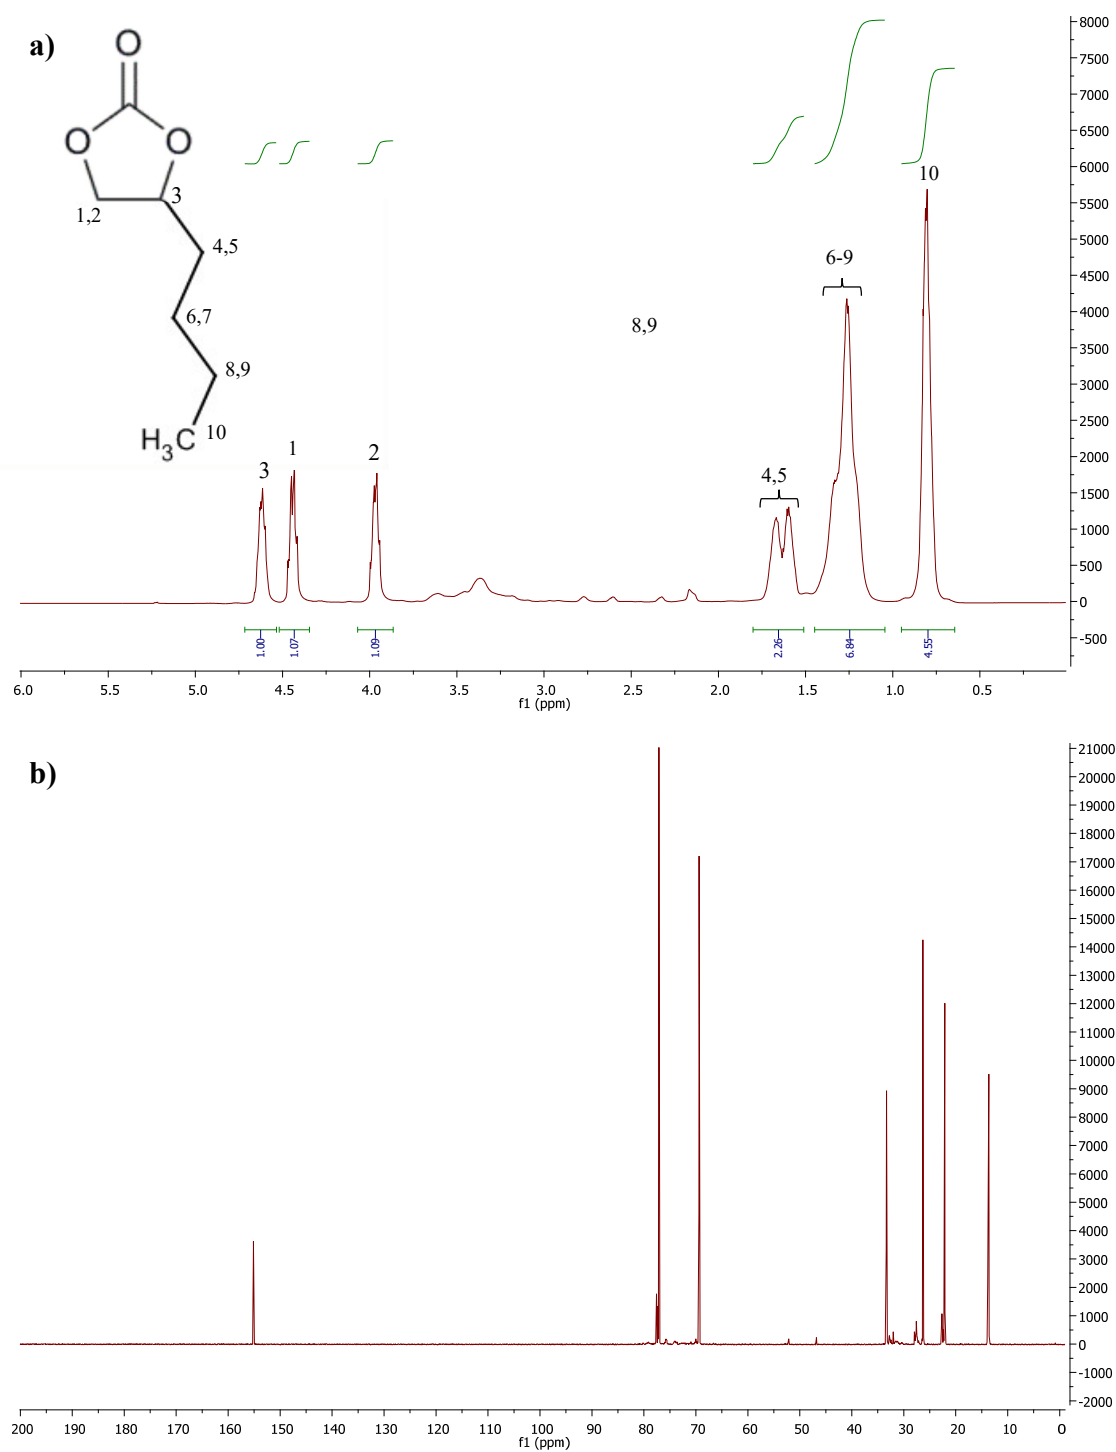

**Figure S16.**  $^1\text{H}$ -NMR (a) and  $^{13}\text{C}$ -NMR (b) spectrum in  $\text{CDCl}_3$  of the product [4-butyl-1,3-dioxolan-2-one] obtained from the reaction mixture of 1,2-epoxyhexane using  $\text{Zn/CN-1000}$  (50 mg),  $\text{CO}_2$  pressure 8 bar,  $140^\circ\text{C}$  for 24h.

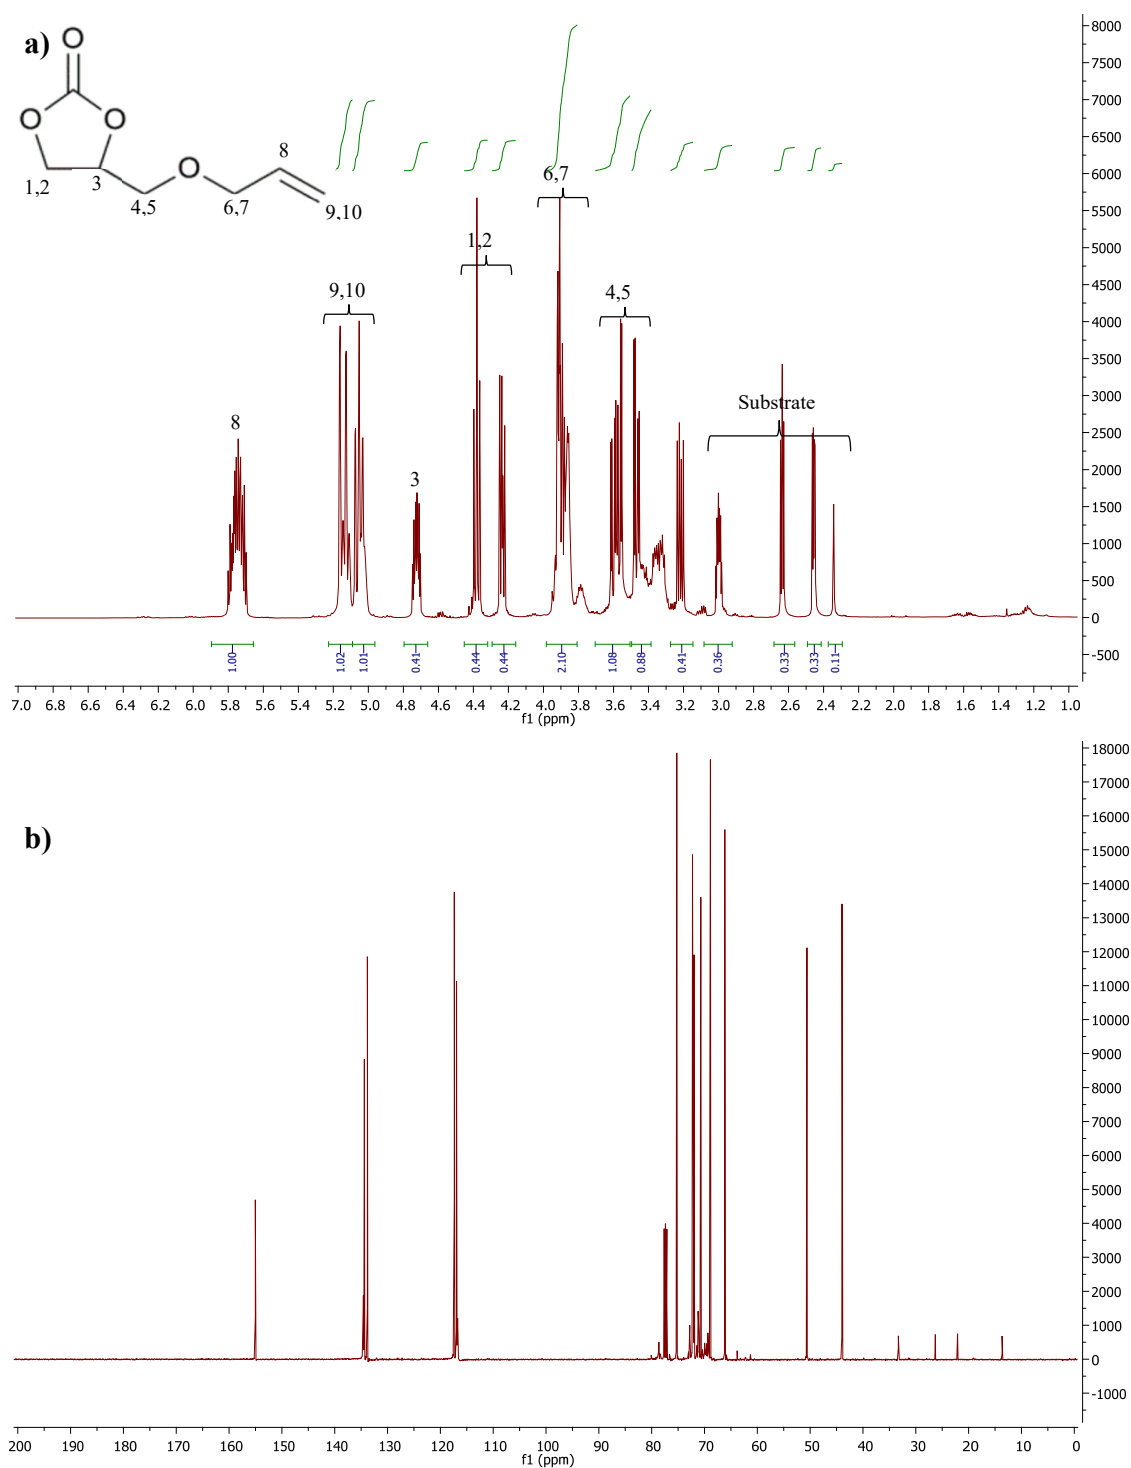

**Figure S17.**  $^1\text{H}$ -NMR (a) and  $^{13}\text{C}$ -NMR (b) spectrum in  $\text{CDCl}_3$  of the product [Allyloxymethyl-1,3-dioxlan-2-one] obtained from the reaction mixture of allyl glycidyl ether using  $\text{Zn/CN-1000}$  (50 mg),  $\text{CO}_2$  pressure 8 bar,  $140^\circ\text{C}$  for 24h.

Boon-NMR  
ZIF-8-RT-1000H2Ar-PropyleneOxide-140C8bar8h

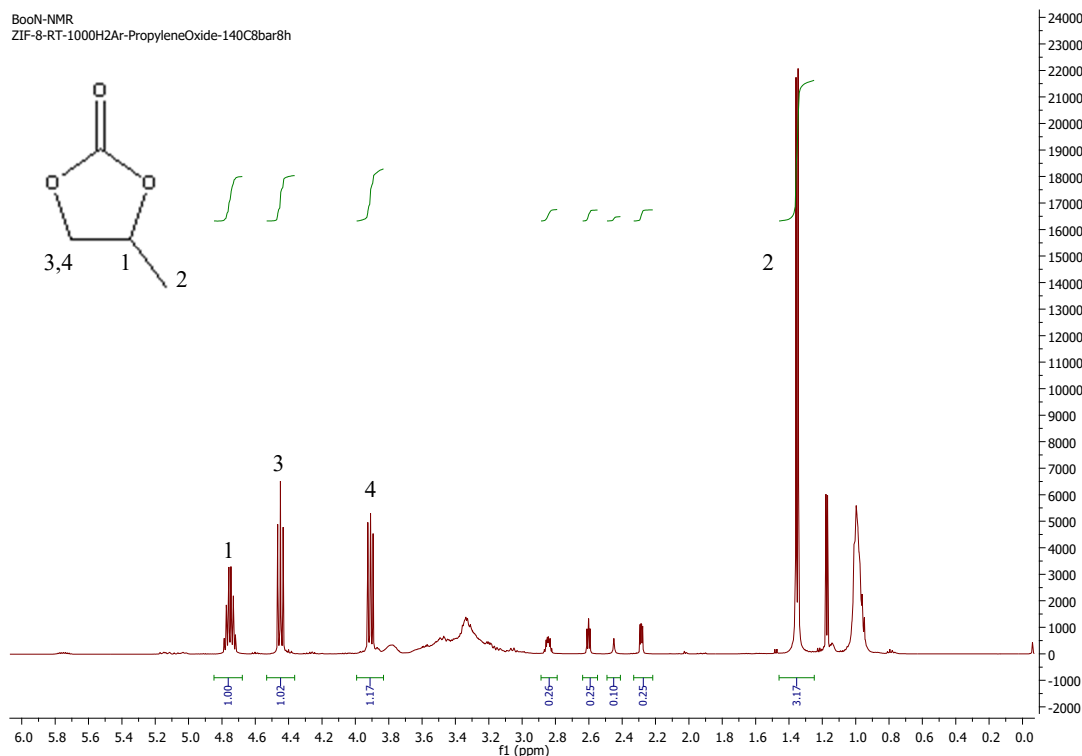

**Figure S18.**  $^1\text{H}$ -NMR spectrum in  $\text{CDCl}_3$  of the product [4-Methyl-1,3-dioxlan-2-one] obtained from the reaction mixture of propylene oxide using Zn/CN-1000 (50 mg),  $\text{CO}_2$  pressure 1.5 bar,  $80^\circ\text{C}$  for 24h.

## References

1. Zhou, K.;Mousavi, B.;Luo, Z.;Phatanasri, S.;Chaemchuen, S.;Verpoort, F. Characterization and properties of Zn/Co zeolitic imidazolate frameworks vs. ZIF-8 and ZIF-67 *Journal of Materials Chemistry A* **2017**, *5*, 952-957.
2. Ding, M.;Chen, S.;Liu, X.-Q.;Sun, L.-B.;Lu, J.;Jiang, H.-L. Metal–Organic Framework-Templated Catalyst: Synergy in Multiple Sites for Catalytic  $\text{CO}_2$  Fixation *ChemSusChem* **2017**, *10*, 1898-1903.
3. Molla, R. A.;Iqbal, A.;Ghosh, K.;Islam, M. Nitrogen-Doped Mesoporous Carbon Material (N-GMC) as a Highly Efficient Catalyst for Carbon Dioxide Fixation Reaction with Epoxides under metal–free condition *ChemistrySelect* **2016**, *1*, 3100-3107.
4. Toyao, T.;Fujiwaki, M.;Miyahara, K.;Kim, T.-H.;Horiuchi, Y.;Matsuoka, M. Design of Zeolitic Imidazolate Framework Derived Nitrogen-Doped Nanoporous Carbons Containing Metal Species for Carbon Dioxide Fixation Reactions *ChemSusChem* **2015**, *8*, 3905-3912.
5. Ma, X.;Zou, B.;Cao, M.;Chen, S.-L.;Hu, C. Nitrogen-doped porous carbon monolith as a highly efficient catalyst for  $\text{CO}_2$  conversion *J. Mater. Chem. A* **2014**, *2*, 18360-18366.
6. Li, Y.;Zou, B.;Hu, C.;Cao, M. Nitrogen-doped porous carbon nanofiber webs for efficient  $\text{CO}_2$  capture and conversion *Carbon* **2016**, *99*, 79-89.
7. Ciprian, M.;Ruiz, K. H.;Kassymova, M.;Wang, T.;Zhuiykov, S.;Chaemchuen, S.;Tu, R.;Verpoort, F. 3D derived N-doped carbon matrix from 2D ZIF-L as an enhanced stable catalyst for chemical fixation *Microporous Mesoporous Mater.* **2019**, *285*, 80-88.

8. Liu, Y.-X.; Wang, H.-H.; Zhao, T.-J.; Zhang, B.; Su, H.; Xue, Z.-H.; Li, X.-H.; Chen, J.-S. Schottky Barrier Induced Coupled Interface of Electron-Rich N-Doped Carbon and Electron-Deficient Cu: In-Built Lewis Acid–Base Pairs for Highly Efficient CO<sub>2</sub> Fixation *J. Am. Chem. Soc.* **2019**, *141*, 38-41.
9. Cui, X.; Dai, X.; Surkus, A.-E.; Junge, K.; Kreyenschulte, C.; Agostini, G.; Rockstroh, N.; Beller, M. Zinc single atoms on N-doped carbon: An efficient and stable catalyst for CO<sub>2</sub> fixation and conversion *Chin. J. Catal.* **2019**, *40*, 1679-1685.
10. Kim, D.; Kim, D. W.; Buyukcakir, O.; Kim, M.-K.; Polychronopoulou, K.; Coskun, A. Highly Hydrophobic ZIF-8/Carbon Nitride Foam with Hierarchical Porosity for Oil Capture and Chemical Fixation of CO<sub>2</sub> *Adv. Funct. Mater.* **2017**, *27*, 1700706.
11. Chaemchuen, S.; Xiao, X.; Ghadamyari, M.; Mousavi, B.; Klomkliang, N.; Yuan, Y.; Verpoort, F. Robust and efficient catalyst derived from bimetallic Zn/Co zeolitic imidazolate frameworks for CO<sub>2</sub> conversion *J. Catal.* **2019**, *370*, 38-45.
12. Guo, Y.; Feng, L.; Wu, C.; Wang, X.; Zhang, X. Confined pyrolysis transformation of ZIF-8 to hierarchically ordered porous Zn-N-C nanoreactor for efficient CO<sub>2</sub> photoconversion under mild conditions *J. Catal.* **2020**, *390*, 213-223.
13. Dai, W.; Zou, M.; Long, J.; Li, B.; Zhang, S.; Yang, L.; Wang, D.; Mao, P.; Luo, S.; Luo, X. Nanoporous N-doped Carbon/ZnO hybrid derived from zinc aspartate: An acid-base bifunctional catalyst for efficient fixation of carbon dioxide into cyclic carbonates *Appl. Surf. Sci.* **2021**, *540*, 148311.
14. Yang, Q.; Yang, C.-C.; Lin, C.-H.; Jiang, H.-L. Metal–Organic-Framework-Derived Hollow N-Doped Porous Carbon with Ultrahigh Concentrations of Single Zn Atoms for Efficient Carbon Dioxide Conversion *Angew. Chem. Int. Ed.* **2019**, *58*, 3511-3515.
15. Yang, Y.; Li, H.; Pei, S.; Liu, F.; Feng, W.; Zhang, Y. Highly efficient Co centers functionalized by nitrogen-doped carbon for the chemical fixation of CO<sub>2</sub> *RSC Adv.* **2020**, *10*, 42408-42412.
16. Samikannu, A.; Konwar, L. J.; Mäki-Arvela, P.; Mikkola, J.-P. Renewable N-doped active carbons as efficient catalysts for direct synthesis of cyclic carbonates from epoxides and CO<sub>2</sub> *Appl. Catal., B Environ.* **2019**, *241*, 41-51.
17. Bondarenko, G. N.; Dvurechenskaya, E. G.; Ganina, O. G.; Alonso, F.; Beletskaya, I. P. Solvent-free synthesis of cyclic carbonates from CO<sub>2</sub> and epoxides catalyzed by reusable alumina-supported zinc dichloride *Appl. Catal., B Environ.* **2019**, *254*, 380-390.
18. Liu, Y.; Chen, Y.; Liu, Y.; Chen, Z.; Yang, H.; Yue, Z.; Fang, Q.; Zhi, Y.; Shan, S. Zn and N co-doped porous carbon nanosheets for photothermally-driven CO<sub>2</sub> cycloaddition *J. Catal.* **2022**, *407*, 65-76.
19. Janeta, M.; Lis, T.; Szafert, S. Zinc Imine Polyhedral Oligomeric Silsesquioxane as a Quattro-Site Catalyst for the Synthesis of Cyclic Carbonates from Epoxides and Low-Pressure CO<sub>2</sub> *Chemistry – A European Journal* **2020**, *26*, 13686-13697.
20. Kuznetsova, S. A.; Rulev, Y. A.; Larionov, V. A.; Smol'yakov, A. F.; Zubavichus, Y. V.; Maleev, V. I.; Li, H.; North, M.; Saghyani, A. S.; Belokon, Y. N. Self-Assembled Ionic Composites of Negatively Charged Zn(salen) Complexes and Triphenylmethane Derived Polycations as Recyclable Catalysts for the Addition of Carbon Dioxide to Epoxides *ChemCatChem* **2019**, *11*, 511-519.
